# Supplementary material for: Pd-doped Ni nanoparticle-modified N-doped carbon nanocatalyst with high Pd atom utilization for the transfer hydrogenation of nitroarenes
Source: Royal Society of Chemistry journal article supplement (doi:10.1039/c7gc03710d), 2018-01-01
Supplement: c7gc03710d1.pdf [file c7gc03710d1.pdf]

**Pd doped Ni nanoparticles modified N-doped carbon nanocatalyst with high Pd atom utilization for transfer hydrogenation of nitroarenes**

*Xueliang Cui, Yu Long, Xia Zhou, Guiqin Yu, Jin Yang, Man Yuan, Jiantai Ma and Zhengping Dong\**

*State Key Laboratory of Applied Organic Chemistry, College of Chemistry and Chemical Engineering, Gansu Provincial Engineering Laboratory for Chemical Catalysis, Lanzhou University, Lanzhou 730000, PR China.*

E-mail: dongzhp@lzu.edu.cn (Zhengping Dong)

Fax: +86 931 8912582; Tel: +86 931 8912577

### **Preparation of mCN**

Firstly, 2.12 g PAN was added to 50 mL DMF at 100°C and vigorously stirred for 30min. Secondly, 30 g melamine was added to the above solution, and continues to stir for another 1h to obtain a thick slurry. Then, the obtained thick slurry was dried in the oven overnight at 120°C and ground into powder. Finally, the powder was pyrolyzed at 900°C for 1h by programmed heating in a nitrogen atmosphere at 5°C/min in a tubular furnace. Thus the mCN was prepared.

### **Preparation of Pd/mCN**

50 mg of mCN was dispersed in 100 mL of deionized water by ultrasonic dispersion. Then, 0.4 mL Pd(AcO)<sub>2</sub> solution (contains 2 mg Pd<sup>2+</sup>) was added to the mCN dispersion mixture. Then, the solution was evaporated and dried in the oven overnight. The obtained Pd<sup>2+</sup>/mCN was reduced at 350°C for 2h in a nitrogen/hydrogen (V<sub>N<sub>2</sub></sub>:V<sub>H<sub>2</sub></sub>=9:1) atmosphere in a tubular furnace.

### **Preparation of Ni/AC**

450 mg of AC was dispersed in 100 mL of deionized water by ultrasonic dispersion. Then, 280mg (Ni(NO<sub>3</sub>)<sub>2</sub>·6H<sub>2</sub>O) was added to the AC dispersion mixture. Then, the solution was evaporated and dried in the oven overnight. The obtained Ni<sup>2+</sup>/AC was reduced at 350°C for 2h in a nitrogen/hydrogen (V<sub>N<sub>2</sub></sub>:V<sub>H<sub>2</sub></sub>=9:1) atmosphere in a tubular furnace.

### **Preparation of NiPd/AC**

The PdNi/AC nanocatalyst was prepared according to the same spontaneous reduction preparation process of PdNi/mCN.

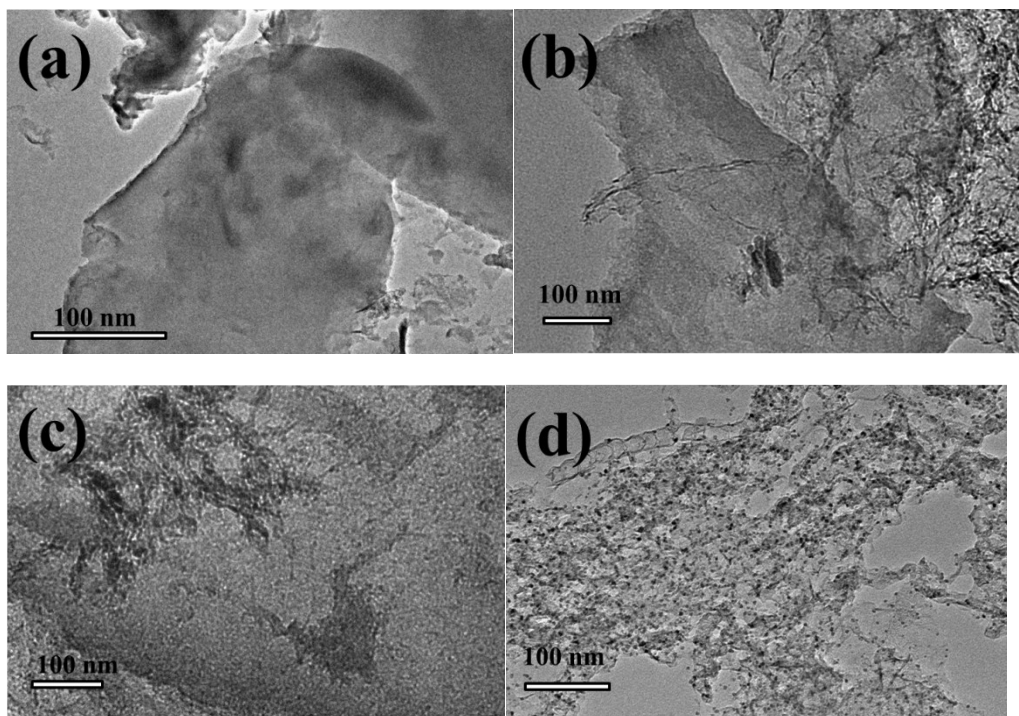

**Fig. S1.** The TEM images of Ni/mCN with different pyrolysis temperatures (a) 600°C, (b) 700°C, (c) 800°C and (d) 900°C.

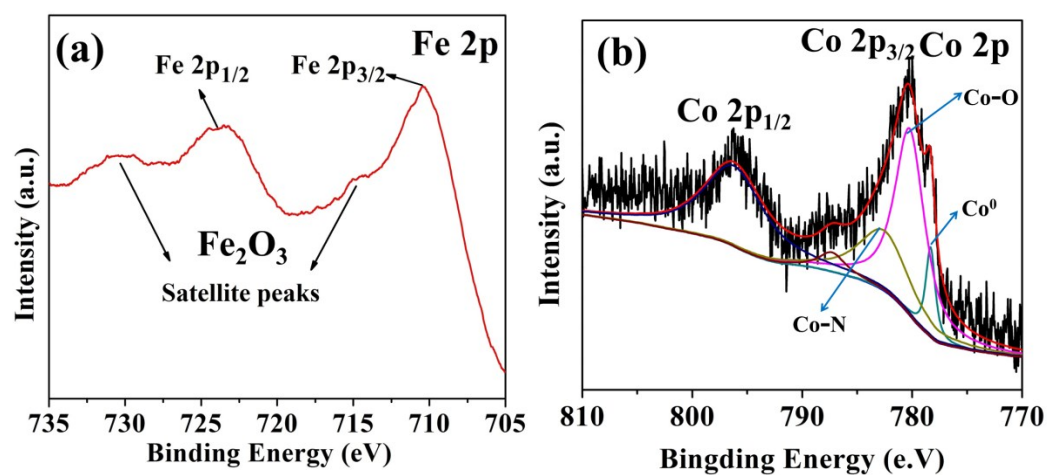

Fig. S2. The (a) Fe 2p spectrum (Fe/mCN), (b) Co 2p spectrum (Co/mCN).

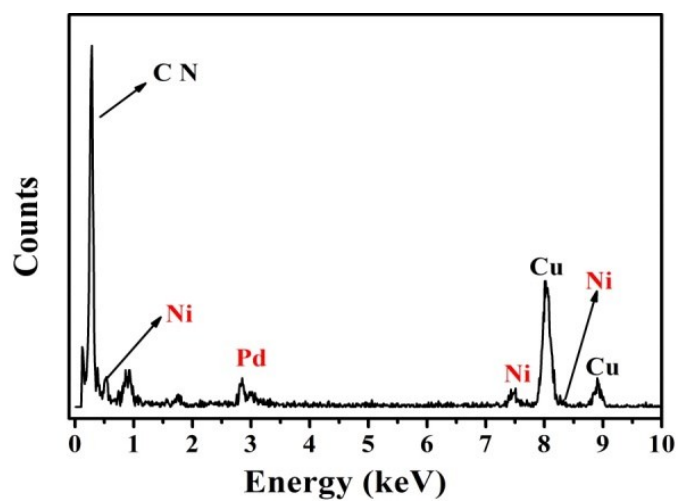

Fig. S3. The EDS spectrum of PdNi/mCN nanocatalysts.

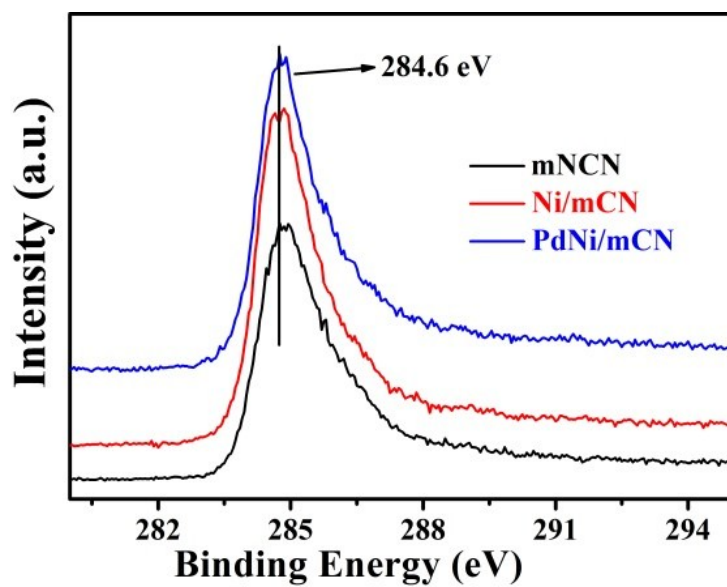

Fig. S4. High resolution XPS spectroscopy of C 1s in different nanocatalysts.

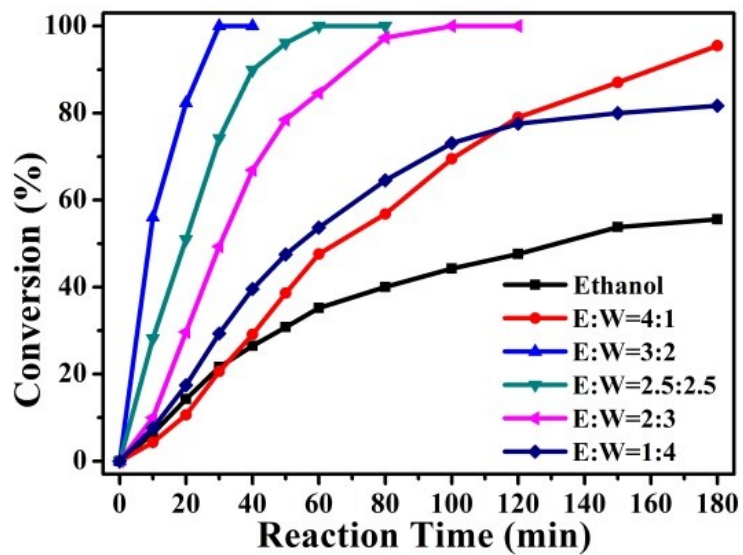

Fig. S5. The curve of the conversion over different times.

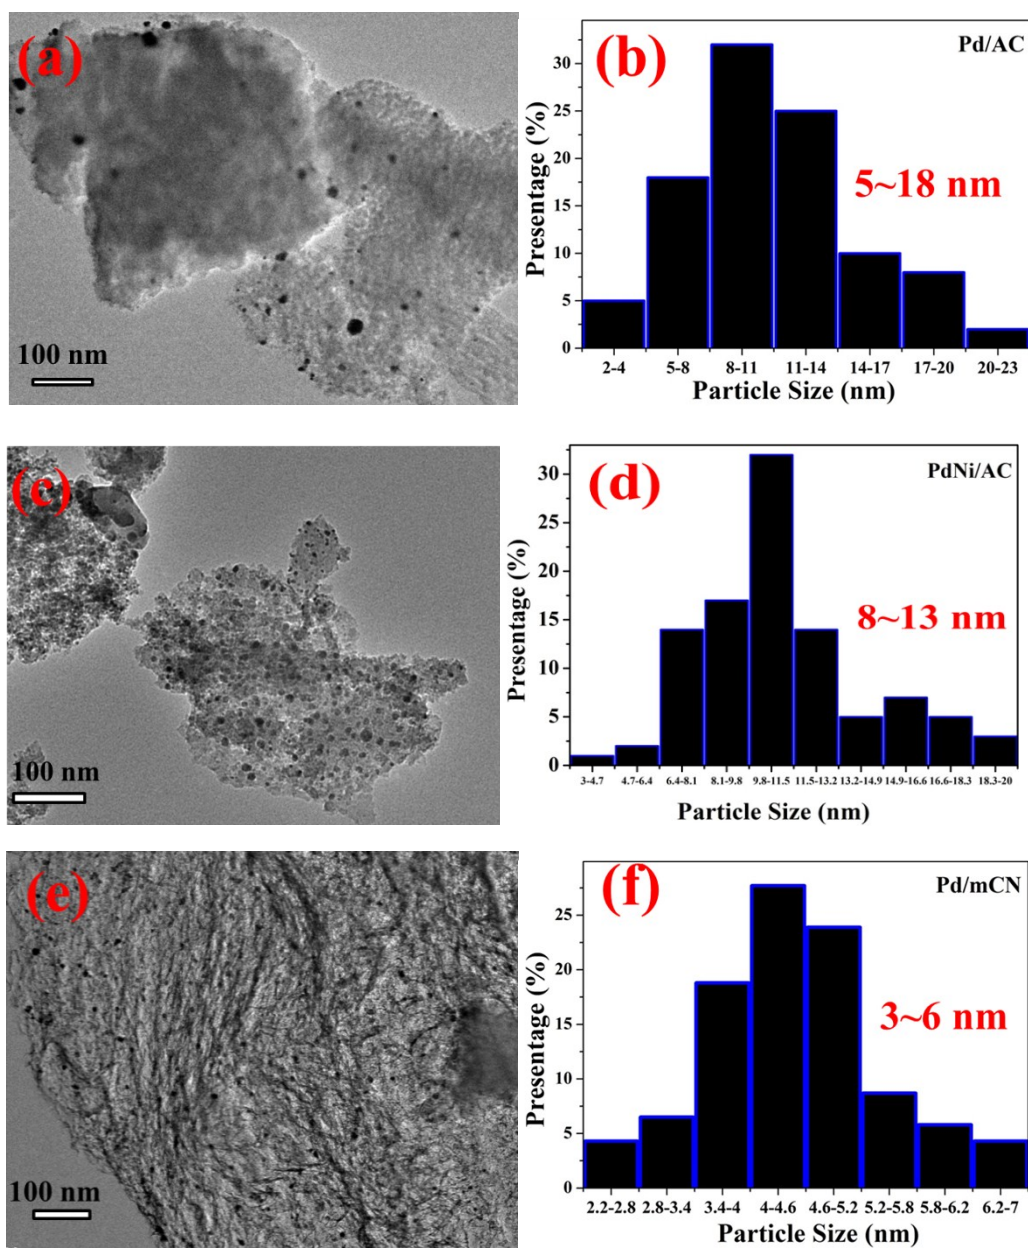

**Fig. S6.** The TEM images of (a) Pd/AC, (c) PdNi/AC, (e) Pd/mCN nanocatalysts, and the corresponding NPs size distribution of Pd/AC (b), PdNi/AC (d), Pd/mCN nanocatalysts (f).



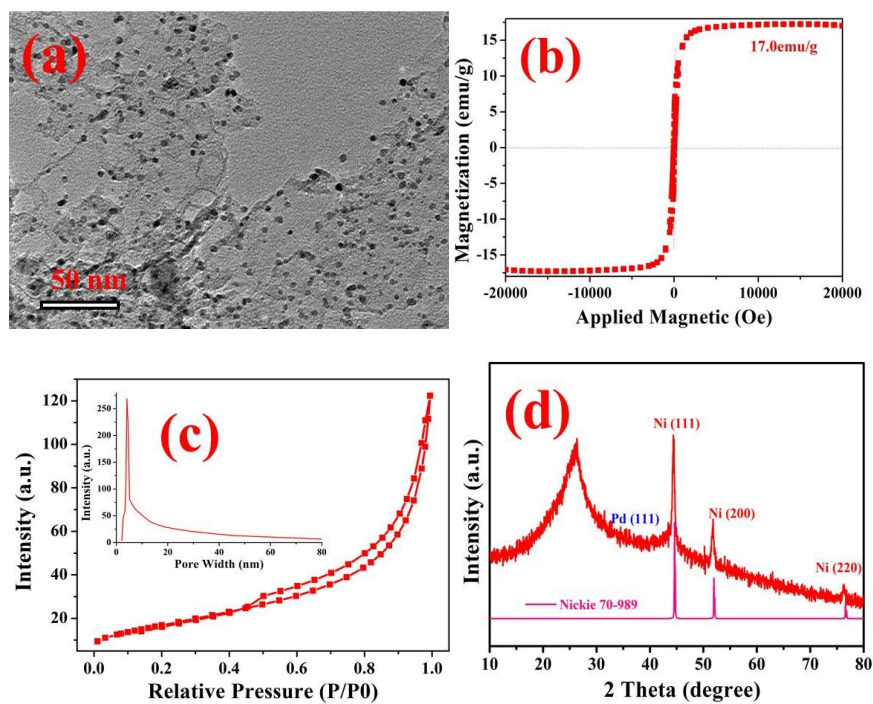

**Fig. S7.** The TEM image (a), VSM curve (b), BET isotherm (c) and XRD pattern (d) of the used PdNi/mCN nanocatalyst.
